# Supplementary material for: Managing migraine with over-the-counter provision of triptans: the perspectives and readiness of Western Australian community pharmacists
Source: PeerJ journal article supplement (doi:10.7717/peerj.8134), 2019-12-16
Supplement: Coding_key.pdf [file Coding_key.pdf]

|                                                               | 1               | 2                       | 3                       | 4                   | 5                            | 6                     | 7     |
|---------------------------------------------------------------|-----------------|-------------------------|-------------------------|---------------------|------------------------------|-----------------------|-------|
| 1. Age                                                        | 21-30           | 31-40                   | 41-50                   | 51-60               | 61+                          |                       |       |
| 2. Gender                                                     | Male            | Female                  | Other/prefer not to say |                     |                              |                       |       |
| 3. Years practising                                           | <6              | 6-20                    | >20                     |                     |                              |                       |       |
| 4. Role in pharmacy                                           | sole proprietor | partner proprietor      | PIC                     | Manager             | employee pharm               | other                 |       |
| 5. Size of operation                                          | small           | large                   |                         |                     |                              |                       |       |
| 6. Setting                                                    | isolated        | shopping strip          | city centre             | medical centre      | small shopping centre        | large shopping centre | other |
| 7. Location                                                   | city            | suburb                  | rural                   | remote              |                              |                       |       |
| 8. Location in relation to nearest Drs                        | co-located      | <100m                   | 101-500m                | 501m-1k             | >1k                          |                       |       |
| 9. Postcode                                                   |                 |                         |                         |                     |                              |                       |       |
| 10. Accredited?                                               | yes             | yes (undergoing accred) | no                      |                     |                              |                       |       |
| 11. Migraine sufferer?                                        | yes             | no                      |                         |                     |                              |                       |       |
| 12.                                                           | strongly agree  | agree                   | don't know/unsure       | disagree            | strongly disagree            |                       |       |
| 13. Current OTC 1st line                                      | paracetamol     | aspirin                 | other NSAIDs            | combined para/NSAID | combined para/metoclopramide | refer                 | other |
| 14. Current OTC preference if 1st line was CI or did not work | paracetamol     | aspirin                 | other NSAIDs            | combined para/NSAID | refer                        | other                 |       |
| 15. 1st line OTC if triptans available                        | paracetamol     | aspirin                 | other NSAIDs            | combined para/NSAID | triptans                     | other                 |       |
| 16. Ranking                                                   | paracetamol     | aspirin                 | other NSAIDs            | Triptans            | opioids                      | other                 |       |

|                                      |                |                  |                   |                                   |                        |                          |                                           |
|--------------------------------------|----------------|------------------|-------------------|-----------------------------------|------------------------|--------------------------|-------------------------------------------|
| 17. Times per month emergency supply | 0              | <2               | 3-4               | >5                                |                        |                          |                                           |
| 18. Meds other than analgesics       | metoclopramide | prochlorperazine | other             | metoclopramide + prochlorperazine | metoclopramide + other | prochlorperazine + other | metoclopramide + prochlorperazine + other |
| 19. Comp meds                        | feverfew       | ginger           | coQ10             | peppermint                        | other                  |                          |                                           |
| 20-25                                | strongly agree | agree            | don't know/unsure | disagree                          | strongly disagree      |                          |                                           |
