# Supplementary material for: Managing migraine with over-the-counter provision of triptans: the perspectives and readiness of Western Australian community pharmacists
Source: PeerJ. 2019 Dec 16;7:e8134. doi: 10.7717/peerj.8134 (PMC6921984; doi:10.7717/peerj.8134)
Supplement: Supplemental Information 1 [file peerj-07-8134-s001.xlsx]

## Sheet: raw data input
Response Number	Q1	Q2	Q3	Q4	Q5	Q6	Q7	Q8	Q9	Q10	Q11	Q12a	Q12b	Q12c	Q12d	Q12e	Q12f	Q12g	Q12h	Q12i	Q12j	Q12k	Q13	Q14	Q15	Q16	Q17	Q18	Q19	Q20a	Q20b	Q20c	Q20d	Q20e	Q20f	Q20g	Q20h	Q20i	Q21a	Q21b	Q21c	Q21d	Q21e	Q21f	Q22a	Q22b	Q22c	Q22d	Q23a
M054	1	1	1	5	1	4	2	1	6153	1	2	2	3	4	2	2	2	2	2	2	2	2	1	3	5	3, 4, 1, 2, 5, n/a	1	4	1	2	2	2	2	3	2	2	2	3	4	4	2	2	4	4	2	2	2	2	2
M023	3	2	3	1	2	5	2	4	6157	1	2	2	3	4	2	4	2	1	1	1	1	1	2	5	5	3, 4, 2, 6, 1, 5 (para/metoclop)	3	4	1, 2, 3, 5 (magnesium)	2	4	4	2	2	1	4	3	1	5	5	1	3	5	5	1	1	2	2	2
M085	2	1	2	2	2	2	1	1	6021	3	2	2	3	4	4	4	2	2	2	1	1	1	4	2	5	2, 3, 1, 4, 5, n/a	1	1	0	2	2	2	2	2	3	4	2	2	4	4	3	3	4	5	1	2	2	2	2
M108	4	1	3	2	2	6	2	4	6059	3	1	2	4	4	4	2	2	3	1	1	1	3	4	2	4	1, 3, 2, 4, 5, n/a	1	1	1	2	3	3	1	2	3	5	5	5	4	4	3	3	4	4	1	1	2	2	3
R52	1	2	1	3	1	2	3	3	6258	3	2	3	3	4	3	2	1	1	1	1	1	2	2	4	5	3, 4, 2, 5, 1("codeine when it was still OTC"), 6	1	1	4	4	4	2	2	2	2	2	3	2	3	2	2	2	2	3	2	2	3	3	4
R60	2	1	2	3	1	2	3	3	6280	1	2	4	3	5	3	4	2	2	2	2	2	2	4	1	4	4, 3, 1, 5, 2, 6	2	0	0	1	2	3	2	4	2	2	5	2	5	4	1	4	4	3	1	4	3	1	4
M075	1	2	1	5	1	5	3	1	6180	3	2	2	2	2	3	1	1	1	1	1	1	3	4	5	5	4, 5, 2, 1, 3, n/a	1	1	1	1	2	2	1	2	2	2	5	3	2	3	1	2	2	2	3	2	3	2	3
M008	4	2	3	3	1	6	2	4	6018	3	2	2	2	4	4	4	2	2	2	2	2	2	5	1	5	1, 2, 3, 4, 5, n/a	1	1	0	2	2	2	2	2	3	4	4	4	2	2	3	3	3	3	2	2	2	3	3
M110	1	1	2	2	2	4	2	1	6027	3	2	1	3	4	2	4	1	4	2	1	1	2	4	3	5	4, 2, 3, 5, 1, n/a	2	2	4	4	4	3	1	5	1	3	1	1	4	4	1	4	5	5	1	1	2	1	3
M122	4	1	3	1	2	2	2	2	6008	1	2	2	3	4	3	2	2	3	2	2	2	2	0	0	0	2, 3, 1, n/a, n/a, n/a	2	4	5 (water, vit B12 injections)	2	2	2	2	2	2	3	2	2	3	4	2	4	4	4	2	3	2	2	2
M024	3	1	3	2	1	4	2	1	6164	3	2	2	3	2	3	2	3	2	2	2	2	2	4	5	5	4, 3, 2, 5, 1, 6	2	4	1, 4	2	3	2	2	3	3	3	3	2	3	2	3	3	4	4	1	1	1	3	1
M152	2	1	1	5	1	2	2	2	6170	3	2	2	3	2	3	2	2	2	2	2	2	2	4	1	4	2, 3, 1, 5, 6, 4(para/NSAID combo)	3	1	5 (magnesium, vit B)	2	2	2	2	2	3	3	3	3	3	4	2	3	4	4	1	2	3	2	3
M188	4	2	1	4	2	2	2	2	6062	1	2	3	2	2	3	2	2	2	1	1	1	1	0	5	5	3, 4, 2, n/a, 1, n/a	1	5	1, 3	2	4	3	1	2	3	3	2	2	4	2	3	3	3	3	2	2	3	2	3
M192	1	1	1	4	2	2	2	5	6076	3	2	2	2	4	4	2	2	2	2	2	2	2	0	4	5	2, 4, 3, 5, 1, 6 ("combo anti-nausea agent")	1	2	4	2	2	2	2	2	3	2	4	2	4	4	2	4	4	3	2	2	3	2	2
M096	4	2	3	1	1	2	2	2	6107	3	2	2	2	4	4	2	1	3	2	1	1	2	5	4	5	4, 3, 1, 5, 2, 6 (maxolon)	1	4	2, 4, 5 (topical magnesium)	2	3	2	2	3	2	3	4	4	4	4	1	3	3	3	1	1	3	2	3
M107	3	2	3	5	2	2	2	2	6009	2	2	1	4	2	4	1	2	2	2	2	1	2	2	3	5	2, 1, 3, 4, 5, n/a	1	1	0	1	1	1	1	0	2	2	1	1	3	2	3	4	4	4	2	2	2	2	2
R18	1	1	2	1	1	2	3	2	6460	1	2	2	3	5	3	2	2	2	1	1	1	2	4	1	5	3, 4, 2, 5, 1("when they were OTC"), n/a	1	1	2, 4	2	2	2	1	1	2	1	1	1	2	4	1	3	5	5	1	1	1	2	1
R57	2	2	2	3	2	5	3	2	6450	1	1	2	3	4	4	2	2	2	2	2	2	2	4	2	5	3, 1, 4, 5, 2, 6(feverfew)	1	2	1, 2, 4	2	2	2	2	2	2	4	4	4	4	4	2	2	4	4	1	1	1	2	4
R14	2	1	2	3	2	2	3	2	6230	1	1	4	4	5	2	4	2	4	2	2	2	2	4	6	5	4, 5, 1, 6, 2, 3(panadol+caffeine)	1	2	3, 4	2	0	2	2	2	3	4	2	4	5	5	2	4	4	5	1	2	2	2	2
M114	2	2	2	2	2	3	1	1	6000	3	2	1	4	4	2	1	2	2	1	1	1	4	4	1	5	4, 5, 3, 2, 1, n/a	1	4	1, 5(Bioceuticals Migraine Care)	2	2	2	1	2	2	4	4	2	5	3	2	3	4	4	1	4	1	2	4
M022	1	1	1	4	1	5	2	3	6073	1	2	4	2	5	4	1	1	2	1	1	1	2	4	5	5	2, 4, 1, 3, 5, 6(para/metoclopramide)	2	1	4	2	2	2	1	2	2	3	2	1	4	3	2	3	4	4	1	1	1	1	3
R03	4	2	3	2	1	5	3	2	6037	3	1	1	3	4	4	1	2	1	1	1	1	1	3	2	5	5, 4, 3, 2, 1, n/a	2	1	1, 2, 3	1	1	1	1	3	1	4	4	1	4	4	1	2	5	5	1	4	2	1	4
R36	4	2	3	4	1	4	3	1	6211	1	1	2	3	4	4	2	2	2	1	1	1	2	5	4	5	3, 2, 1, 4, n/a, n/a	1	1	2	1	1	1	1	1	2	2	3	1	4	3	2	4	4	4	1	2	2	4	2
R06	1	1	1	5	1	5	2	1	6210	3	2	2	4	5	3	1	2	1	1	1	1	4	4	2	5	2, 4, 5, 3, 1, n/a	1	1	1, 3	1	2	3	1	1	2	1	1	1	2	2	1	1	5	2	1	1	2	4	2
M172	3	1	2	4	1	2	2	3	6152	3	2	1	3	4	1	2	2	2	1	2	1	1	4	2	5	3, 2, 4, 5, 1	1	2	1	1	5	4	2	2	2	4	1	1	5	4	2	4	5	5	1	1	1	1	3
M044	3	1	2	3	2	5	2	2	6027	3	2	3	3	3	4	2	2	2	1	2	1	2	4	1	5	2, 4, 3, 6, 1, 5	1	7	5(Mg)	1	2	2	2	2	3	3	4	2	4	4	3	3	4	5	1	2	3	3	3
M150	2	1	2	2	1	5	1	4	6015	3	2	4	2	4	2	2	2	4	2	1	2	1	4	6	5	4, 5, 3, 6, 1, 2(sedating antiistamine)	2	7	4, 5(Mg)	1	1	1	1	2	1	4	2	1	4	5	2	4	5	5	2	2	2	2	2
M063	4	1	3	2	2	2	2	2	6057	3	2	1	3	4	4	1	1	1	1	1	1	1	3	5	5	3, 4, 2, 5, 1, n/a	1	2	0	2	4	3	1	2	3	4	5	1	4	5	3	4	4	5	1	1	1	4	4
M086	2	1	2	2	2	3	1	2	6000	1	2	1	1	5	3	2	2	2	1	1	1	1	7	6	6	2, 4, 3, 5, 1, 6	2	7	0	2	2	2	3	2	1	3	5	2	1	4	1	3	4	4	1	1	3	4	4
M071	1	2	1	3	1	4	2	1	6107	1	1	2	3	4	3	2	1	2	1	1	1	1	4	1	5	3, 5, 2, 6, 1, 4(metoclop)	3	7	4	2	2	2	1	2	2	3	3	1	2	4	1	2	4	5	1	1	1	1	1
M032	3	2	2	3	1	2	2	4	6151	3	2	2	0	4	4	2	4	3	2	1	1	1	4	1	4	2, 3, 1, 5, 4, 6(non-pharmacological)	1	4	1	2	4	2	1	3	2	3	4	1	4	3	2	4	4	4	0	0	0	0	0
M133	1	2	1	5	1	5	2	2	6157	1	1	2	3	4	4	2	2	2	1	1	1	1	4	5	5	3, 5, 2, 1, 4, n/a	2	1	1, 5 (Mg, B6)	2	3	2	2	2	0	4	4	1	2	2	3	2	4	4	1	2	2	2	4
R01	2	1	2	2	2	2	3	4	6317	3	2	2	3	5	3	2	2	2	1	1	1	2	2	1	2	1, 4, 3, 5, 2, n/a	1	4	0	1	3	1	1	2	1	4	4	3	2	2	1	2	3	2	1	1	3	2	2
R26	2	2	1	3	1	1	4	5	6514	3	2	3	3	3	4	4	4	3	4	5	5	4	3	3	5	4, 3, 2, 5, 1, 6(Mg, CoQ10)	1	1	3	2	3	3	2	2	2	2	3	2	3	4	1	3	2	2	2	2	3	3	3
R69	2	1	2	4	2	2	3	4	6415	3	2	2	3	4	3	3	2	3	2	1	1	3	1	4	4	1, 4, 2, 3, 5, n/a	2	2	2	2	4	0	2	3	3	4	2	2	5	2	2	3	3	5	1	1	2	5	3
M050	1	2	2	4	1	4	2	1	6150	3	2	2	2	5	3	2	2	2	1	1	1	2	2	4	2	3, 4, 2, 5, 1, n/a	1	1	5(migrastick)	2	5	2	1	2	2	4	4	2	4	3	1	3	2	2	1	1	4	2	4
M164	2	1	2	2	2	5	2	1	6172	1	2	1	3	4	4	2	1	2	1	1	1	1	5	4	4	1, 6, 4, 5, 2, 3(metoclopramide)	1	1	1, 5(tigerbalm)	2	2	2	2	1	1	4	5	2	5	2	2	4	4	5	1	1	3	2	3
R42	1	1	2	2	1	1	3	2	6315	2	2	1	3	5	2	1	1	1	1	1	1	1	4	5	4	5, 3, 2, 4, 1, n/a	1	4	0	2	4	4	1	2	1	4	5	1	5	5	1	1	5	5	1	1	1	1	2
R50	2	2	2	2	2	2	3	3	6525	1	2	1	3	5	2	2	1	2	1	1	1	2	2	4	5	4, 1, 3, 6, 2, 5(para/ibuprof combo)	2	1	0	2	2	2	2	2	2	2	2	1	1	4	1	3	4	4	2	1	2	1	2
M102	1	2	1	3	2	5	2	1	6065	3	2	2	2	2	2	1	1	1	1	1	1	2	1	4	5	3, 5, 2, 1, 4, 6	2	1	5 (bioceuticals migraine care and magnsium)	2	2	2	2	2	3	3	4	4	4	3	3	2	3	2	2	2	3	3	2
M144	4	1	3	5	2	6	2	3	6030	1	2	2	3	4	5	1	1	2	1	1	1	1	4	5	5	2, 3, 1, 6, 5, 4(para/metoclop)	2	1	2	1	3	1	2	1	1	1	3	1	4	4	1	3	4	4	1	2	3	1	2
R44	4	1	3	1	2	1	3	4	6707	3	2	2	3	4	3	2	2	2	2	2	2	2	5	2	2	4, 2, 1, 3, 5	1	1	1	2	2	2	2	2	3	2	2	2	4	3	2	2	4	4	2	2	2	2	2
R37	2	1	2	4	1	6	2	5	6210	1	2	2	3	4	3	4	2	2	2	2	2	2	1	4	5	2, 4, 1, 6, 5, 3(anagraine)	1	1	1	2	2	2	2	2	3	2	3	3	4	3	3	3	3	3	2	2	2	2	4
R65	3	1	2	3	1	1	3	4	6353	2	2	2	2	4	4	2	2	4	2	1	2	2	1	4	5	n/a	1	1	1	2	2	2	2	2	2	4	2	2	3	4	2	2	4	4	2	4	2	2	2
R05	2	2	2	2	1	4	2	1	6210	3	2	2	2	4	4	2	2	2	2	2	1	2	1	4	5	3, 4, 2, 5, 1, 6	1	1	2, 4	4	4	2	2	2	2	3	2	2	2	4	2	3	4	4	1	2	3	3	4
R62	1	2	1	5	0	5	3	2	6208	1	2	2	4	0	2	4	2	2	1	1	1	2	1	3	4	1, 4, 2, 3, 5, 6	2	1	4	1	2	2	2	1	1	2	4	3	1	2	1	2	2	2	1	1	4	2	2
R41	2	1	2	4	1	1	3	3	6383	3	2	3	3	3	3	2	2	0	1	1	1	2	4	5	4	4, 2, 3, 5, 1	1	1	2	4	3	3	4	2	1	2	4	2	3	4	2	2	4	4	2	3	2	2	3
R64	1	1	1	3	1	2	3	3	6430	3	2	3	3	5	2	2	1	1	1	1	1	1	2	4	5	1, 5, 3, 4, 2	1	1	0	2	3	3	2	4	3	3	2	2	4	4	3	3	4	3	2	2	2	3	2
M124	2	1	2	3	2	5	2	3	6054	3	1	2	3	4	2	2	1	1	1	1	1	1	4	1	4	3, 4, 2, 5, 1, 0	2	1	1	2	4	3	1	2	1	2	4	4	2	4	2	3	4	4	1	1	2	4	4
M130	1	1	2	5	1	5	2	3	6056	1	2	3	3	2	5	4	3	3	1	1	1	2	3	1	5	3, 4, 2, 5, 1, 6(metoclopramide)	1	2	1, 3, 5(bioceuticals migraine care)	4	2	2	2	2	3	2	2	1	2	3	3	4	4	4	2	2	2	2	2
M090	2	2	2	4	1	2	2	4	6148	1	2	2	3	4	4	4	2	2	2	2	1	2	2	4	5	4, 3, 2, 5, 1, 0	2	1	0	1	4	2	1	1	1	4	2	1	2	2	1	3	4	4	1	2	2	1	2
M120	5	1	3	1	1	4	2	1	6024	3	2	2	3	4	2	2	2	2	2	2	2	2	5	2	5	3, 4, 2, 5, 6, 1(paracetamol/ibuprofen combined)	1	1	4	2	2	2	2	2	2	2	2	2	2	3	2	2	4	4	2	2	2	2	2
M180	2	1	2	1	1	2	1	5	6004	3	2	2	3	4	3	2	1	1	1	1	1	1	4	2	4	0, 0, 0, 0, 1, 0	1	2	1	1	1	1	1	1	3	4	2	2	2	2	3	3	4	5	1	1	1	1	1
M039	1	2	2	2	2	2	2	1	6008	1	1	2	3	4	4	2	2	2	2	2	2	2	2	4	2	4, 3, 2, 5, 1, 0	2	1	1	2	2	2	2	2	2	2	4	4	4	4	2	2	2	2	2	2	4	2	2
M168	1	2	1	6	0	4	2	1	6103	3	2	2	3	4	2	2	2	2	2	2	2	2	0	4	0	3, 2, 1, 0, 0, 0	3	1	2	2	3	3	2	2	2	3	2	2	4	2	2	3	4	3	2	2	3	2	2
M047	4	1	3	2	2	5	2	3	6063	3	1	2	3	4	4	1	1	3	1	1	1	2	4	2	5	2, 3, 1, 5, 4, 0	1	4	1	2	3	2	2	2	2	4	4	2	4	3	2	3	3	4	1	2	2	2	3
M165	2	1	2	2	2	4	2	1	6105	3	2	3	3	4	4	2	2	2	2	2	2	2	3	1	3	2, 3, 1, 4, 5, 6	1	1	4	2	4	2	1	2	2	2	2	3	4	3	2	3	3	2	2	2	2	3	3
M171	2	2	3	4	1	1	3	5	6082	3	2	2	3	4	3	1	1	1	1	1	1	2	1	3	1	3, 5, 2, 4, 1, 6	1	2	0	1	1	1	1	1	3	3	5	5	5	4	3	3	3	4	1	1	4	3	5
M203	3	1	3	1	2	2	2	2	6155	3	2	2	3	4	4	2	2	2	2	2	1	2	4	5	5	1, 2, 3, 6, 5, 4(metoclopramide/paracetamol/phenergan)	1	2	1	2	2	2	2	2	2	3	1	4	4	4	2	3	5	5	1	1	2	3	2
M115	2	1	2	2	1	2	2	2	6076	1	2	2	3	4	3	1	2	2	1	1	1	2	0	5	0	2, 5, 1, 3, 4, 0	1	1	0	2	3	3	1	2	2	2	4	1	4	3	2	4	4	4	2	1	1	0	3
M053	2	2	2	5	1	5	2	2	6163	3	2	2	3	4	4	2	2	2	2	1	1	2	1	4	1	3, 4, 2, 5, 1, 0	1	1	4	2	3	2	1	2	2	2	3	3	4	2	2	2	4	3	1	1	3	3	2
M030	3	1	2	2	2	2	2	4	6100	3	2	2	3	4	4	2	2	2	2	2	1	1	4	3	4	4, 2, 3, 5, 1, 0	2	1	5(bioceuticals migraine care)	1	2	2	1	2	2	4	2	2	4	4	4	4	4	5	2	2	2	2	2
M001	5	1	3	4	1	2	2	5	6061	3	2	0	0	0	0	0	0	0	0	0	0	0	0	0	0	0	0	0	1	3	4	2	2	3	3	3	3	1	4	3	2	3	4	4	1	1	2	3	4
M072	2	2	2	5	1	4	2	1	6163	3	2	2	4	2	3	2	2	2	2	2	2	2	3	5	3	3, 2, 1, 4, 5, 0	1	1	4	2	2	2	3	2	2	2	4	4	2	3	2	2	2	2	2	2	4	3	4
M058	5	1	3	2	2	4	2	1	6110	1	2	2	3	4	4	1	1	2	1	1	1	1	5	4	6	3, 2, 1, 4, 5, 0	2	1	0	2	4	2	1	2	2	1	4	1	1	4	1	4	4	4	1	2	2	1	2
M076	1	2	2	4	2	1	2	4	6018	3	2	2	2	4	4	2	2	2	1	1	1	2	2	4	5	3, 4, 2, 5, 1, 0	2	1	1	2	2	2	1	3	2	2	4	1	4	2	2	2	4	4	2	3	2	2	2
M103	5	2	3	2	1	2	2	3	6009	1	2	1	3	3	2	1	1	1	1	1	1	2	4	5	5	3, 2, 1, 5, 4, 0	1	1	1	0	0	0	1	1	0	4	4	2	4	2	2	2	4	4	2	2	2	2	3
R49	3	2	2	5	2	4	3	1	6280	1	1	2	3	4	5	1	2	2	2	2	1	2	4	5	5	5, 4, 3, 1, 6, 2 (combo para/NSAID	2	1	1	2	4	2	4	2	4	4	2	2	4	4	3	3	4	4	1	2	2	2	2
R70	2	2	2	3	1	5	3	2	6530	3	2	2	3	5	3	2	2	3	1	2	1	2	2	1	5	2, 3, 1, 5, 4, 6	1	2	4	2	2	2	1	2	2	2	3	3	3	2	2	3	4	2	1	2	3	3	3
M003	3	2	2	1	1	2	2	1	6151	3	2	2	2	4	4	2	2	2	2	2	2	2	3	1	5	3, 4, 2, 5, 1, 0	2	1	1, 5(magnesium)	2	3	2	2	2	2	3	4	2	3	2	2	2	4	4	1	1	4	2	4
M176	2	1	2	5	2	5	2	2	6112	3	2	2	3	5	3	1	1	3	1	1	1	3	4	1	1	2, 5, 3, 4, 1, 0	4	0	0	2	4	4	2	3	1	3	4	3	2	2	1	2	4	4	2	2	4	2	3
M104	4	1	3	3	1	2	2	1	6162	1	2	1	3	5	4	2	2	3	2	1	1	1	5	4	5	1, 2, 3, 0, 0, 0	1	1	0	2	3	3	2	2	3	4	4	2	3	3	2	3	4	3	1	1	3	3	4
M162	3	2	2	3	1	5	2	2	6111	3	2	1	1	0	1	1	1	1	1	1	1	1	3	4	5	2, 4, 1, 3, 5, 0	2	1	1	2	3	3	1	1	1	1	5	4	2	1	1	1	4	5	1	1	2	5	3
M143	3	1	2	1	1	5	2	2	6069	1	2	2	3	4	3	4	2	2	2	2	2	2	5	5	4	1, 4, 2, 5, 3, 0	1	2	2	2	3	2	2	3	3	2	4	2	4	3	3	3	4	4	2	2	3	3	4
M065	2	2	2	5	2	6	2	1	6025	3	2	1	3	2	2	1	1	1	1	1	1	1	5	3	5	1, 3, 2, 0, 0, 0	1	1	1	2	3	2	1	2	3	2	4	2	2	5	2	3	1	1	1	1	3	2	4
R12	2	3	1	6	2	6	3	1	6530	1	2	2	4	4	2	4	2	2	2	2	2	2	0	2	3	0, 0, 1, 0, 0, 0	4	1	3, 4	2	4	2	2	2	2	2	2	3	4	2	2	3	3	3	2	2	2	2	2
M027	4	1	3	1	1	2	2	3	6063	3	2	2	4	4	4	2	2	2	1	1	1	1	7	4	5	0, 0, 0, 0, 1, 0	2	1	1, 5(acupuncture)	2	2	2	1	2	2	4	4	2	4	3	2	4	4	4	1	1	1	2	3
M041	2	1	2	2	2	2	2	2	6019	1	2	2	3	5	4	1	1	1	1	1	1	2	2	1	2	2, 4, 3, 6, 1, 0	1	1	1, 2	2	2	2	1	2	1	2	3	2	4	4	1	3	4	4	1	2	2	3	2
M195	1	2	1	3	0	6	2	3	6164	3	2	1	2	4	2	1	1	2	1	1	1	1	5	3	4	1, 3, 2, 4, 5, 0	2	4	1	2	3	2	2	2	2	2	4	2	2	3	1	2	3	3	2	2	3	2	3
M055	1	2	1	4	2	2	2	3	6100	3	2	2	2	4	3	2	2	2	2	2	2	2	2	4	4	3, 2, 1, 4, 5, 0	2	2	4	2	4	3	2	2	4	2	4	3	4	4	2	2	4	3	2	2	2	2	3
R21	4	1	3	1	1	1	3	4	6438	3	2	2	2	2	3	2	3	4	2	2	1	2	2	4	5	5, 3, 4, 2, 1, 0	2	1	4	2	2	2	1	2	3	5	1	1	5	4	3	3	4	5	1	5	1	2	2
M167	1	2	1	5	2	4	2	2	6036	3	2	1	3	5	3	1	1	1	1	1	1	1	2	3	5	5, 2, 1, 4, 3, 0	1	1	5(magnesium)	1	1	1	1	3	1	1	5	1	5	2	1	1	4	4	1	1	5	5	3
M006	1	2	2	4	2	2	1	1	6000	3	2	2	3	5	2	2	2	2	2	2	2	2	4	1	4	2, 3, 1, 5, 4, 0	1	7	1	2	2	2	2	2	2	2	4	2	2	2	2	2	4	2	2	2	2	3	2
M146	2	1	2	2	1	2	2	2	6076	3	1	2	2	4	4	3	2	2	1	1	1	2	4	5	0	3, 4, 2, 5, 1, 6(combo analgesic/antinausea)	2	1	0	2	2	2	1	2	1	4	4	1	4	3	1	2	4	4	1	2	2	3	3
R27	2	1	2	5	2	7	1	1	6210	3	2	2	3	5	2	2	2	2	2	2	1	2	0	5	0	3, 4, 2, 6, 1, 5	1	1	0	2	2	2	4	2	4	2	3	2	2	3	2	3	4	3	2	2	3	3	4
R22	2	2	2	2	1	1	4	5	"wish to remain anonymous"	3	1	2	4	5	4	2	2	2	2	2	1	2	4	3	5	2, 4, 3, 5, 1, 0	1	1	4	2	4	4	4	2	2	3	4	2	4	2	2	4	4	4	1	2	2	2	3
M092	1	2	1	3	1	4	2	1	6027	2	2	3	3	5	2	2	1	4	1	1	1	1	4	5	4	3, 4, 1, 5, 2, 0	3	1	1, 5(magnesium)	2	4	4	1	2	2	1	4	4	2	4	4	4	4	4	1	1	2	1	2
R24	2	1	1	3	1	5	3	3	6530	3	2	2	3	4	2	2	2	2	2	2	2	2	1	4	5	2, 4, 3, 5, 1, 0	3	4	1, 5(magnesium)	2	3	2	2	2	2	4	3	2	4	4	2	2	2	3	1	1	1	1	2
M035	1	2	1	3	1	1	1	4	6101	1	2	2	3	4	3	2	1	1	1	1	1	1	5	4	5	3, 4, 2, 1, 5, 0	2	1	2	2	2	2	2	2	1	3	4	1	2	4	1	3	4	4	2	1	2	2	2
M002	2	2	2	5	2	3	1	2	6000	3	1	2	2	4	4	4	2	1	1	1	1	1	4	5	5	0	2	2	1, 3, 5(B2, magnesium)	2	2	2	2	2	2	3	4	2	3	2	1	3	4	4	1	1	2	2	2
M131	2	1	2	2	1	4	2	1	6168	1	2	3	3	5	4	2	2	2	2	2	1	1	2	1	2	1, 4, 2, 6, 5, 3(paracet/ibuprofen)	1	4	1,3, 5(magnesium)	2	4	3	1	1	2	3	5	3	5	4	2	4	4	3	1	1	2	1	3
M159	3	2	2	4	1	2	2	4	6112	3	2	2	3	5	3	2	2	2	1	1	1	2	2	5	2	4, 2, 3, 5, 1, 0	1	1	4	2	3	2	1	2	3	5	4	2	4	2	2	2	3	2	1	1	3	3	3
M077	2	2	2	2	1	6	1	3	6062	3	2	2	0	3	4	2	2	2	1	2	1	2	4	0	4	3, 4, 2, 5, 1, 0	1	1	1	2	2	2	2	3	0	3	3	3	2	2	3	2	3	3	3	2	3	3	3
M153	1	2	1	5	0	5	2	1	6065	3	2	2	3	3	2	2	2	2	1	1	1	2	2	3	2	2, 3, 4, 5, 1, 0	1	1	2	2	3	2	2	2	1	3	3	3	2	2	1	3	3	3	1	1	3	3	3
R17	2	2	1	3	1	1	3	3	6609	3	2	2	2	4	3	2	2	2	2	2	2	3	4	2	4	0	1	1	3	1	0	3	1	2	1	1	3	1	4	2	2	2	4	2	1	1	3	1	4
R34	2	2	2	3	1	2	3	2	6232	3	2	2	3	4	4	1	1	1	1	1	1	2	3	1	5	3, 2, 1, 5, 4, 6	1	1	4, 5(ice/heat pack)	2	4	2	1	2	1	2	4	2	4	2	1	1	2	4	1	1	3	2	4
M061	2	2	1	5	1	3	1	4	6000	3	2	1	3	2	5	4	2	3	1	1	1	1	4	2	5	2, 3, 4, 5, 1, 0	3	1	4	1	2	2	2	3	1	4	2	2	4	4	1	3	3	4	2	1	2	2	2
M026	3	1	3	2	1	4	2	1	6020	3	2	4	3	5	4	1	1	1	1	1	1	2	4	2	5	2, 1, 3, 4, 5, 0	1	1	4	1	2	2	1	2	4	4	3	4	2	2	2	2	4	4	1	1	2	2	2
R25	2	2	1	5	1	2	3	4	6530	3	2	2	0	4	4	4	2	2	2	2	2	2	1	3	4	4, 3, 2, 1, 5, 0	1	1	1	2	4	2	2	1	2	3	4	2	0	2	2	3	2	2	2	2	3	2	4
R66	1	1	1	5	1	1	3	3	6516	3	2	2	3	5	2	1	2	3	1	1	1	1	6	5	5	3, 3, 1, 4, 1, 0	1	4	0	2	2	2	1	2	1	3	4	2	4	4	1	2	5	4	1	1	3	1	3
M169	2	1	2	1	1	4	2	1	6069	3	2	3	5	5	1	1	1	1	1	1	1	1	4	5	5	2, 3, 1, 4, 5, 0	1	4	0	5	5	5	1	1	3	5	1	1	5	5	1	3	5	5	1	1	1	1	5
R61	2	1	2	3	2	5	4	3	6725	3	2	2	3	5	4	2	2	2	1	1	1	2	2	1	5	3, 5, 2, 4, 1, 0	1	1	0	2	4	3	2	2	3	4	2	4	2	4	3	3	4	4	1	1	1	2	4
M056	2	1	2	2	2	5	2	2	6109	3	2	2	3	4	3	2	2	4	1	1	1	2	4	3	5	2, 3, 1, 4, 5, 0	3	1	4	2	3	3	1	2	3	4	2	1	4	2	2	2	4	4	1	2	2	2	2
M034	2	2	2	3	1	4	1	1	6027	3	2	3	3	4	1	2	2	2	2	1	2	4	2	1	5	4, 2, 3, 5, 1, 6	1	2	0	4	4	2	2	2	3	4	4	1	4	4	3	3	4	4	0	0	0	0	0
M182	3	2	3	3	1	2	2	3	6157	3	2	5	5	5	4	2	1	2	2	1	1	1	2	3	2	1, 3, 2, 5, 4, 6	1	1	1, 5(B2)	2	5	1	1	2	1	2	4	2	2	4	2	1	4	4	1	1	1	1	2
M009	1	1	2	3	2	5	2	2	6112	3	2	2	3	4	2	1	2	3	1	1	1	2	4	5	5	3, 4, 2, 1, 5, 0	2	4	1	2	3	3	1	3	2	4	2	2	2	2	1	3	4	4	1	2	3	2	2
M186	3	1	2	2	1	1	3	2	6350	3	2	1	1	4	2	1	1	1	1	1	1	1	0	0	0	1, 2, 3, 5, 4, 0	4	1	1	1	1	1	1	3	2	2	1	3	1	2	2	2	4	4	2	2	2	2	2
M135	2	2	2	3	1	4	2	1	6167	3	2	1	3	4	4	1	2	4	1	1	1	1	1	3	4	3, 4, 2, 5, 1, 0	1	1	0	1	2	2	1	1	3	2	4	4	2	3	1	2	2	2	2	1	3	4	2
M187	4	1	2	2	2	5	2	3	6085	3	2	0	0	0	0	0	0	0	0	0	0	0	5	4	5	2, 4, 1, 3, 6, 2(Mg)	4	2	1, 4, 5(migrainecare)	3	2	0	2	4	3	0	2	1	4	2	3	2	4	5	1	1	2	1	1
M155	5	1	3	3	2	4	2	1	6056	3	2	3	3	5	3	2	2	3	2	2	1	5	0	1	1	0	2	4	1	2	3	3	5	3	3	5	5	4	3	1	2	3	5	2	1	3	3	3	3
M183	4	1	2	2	2	4	2	2	6167	3	2	2	3	0	4	2	3	3	1	2	1	2	4	1	5	3, 4, 2, 6, 1, 0	2	1	4	2	3	2	2	3	0	2	2	1	4	2	2	3	4	2	2	3	2	2	2
M145	1	2	1	2	1	4	2	2	6169	3	2	2	2	4	3	0	2	1	1	1	1	2	4	5	4	3, 4, 2, 5, 1, 0	1	1	1	2	3	3	2	2	1	2	3	2	4	3	1	3	0	0	1	2	3	2	3
M021	2	1	2	1	1	4	2	1	6164	1	2	2	3	4	3	2	2	4	2	1	1	2	2	1	5	5, 3, 4, 2, 1, 6	2	1	3	2	2	2	1	2	4	3	4	2	2	3	2	3	4	4	1	1	4	2	3
R19	1	2	1	3	2	1	3	3	6324	1	2	2	2	2	2	1	2	2	1	1	1	2	1	0	1	4, 2, 3, 0, 1, 0	1	0	1, 3, 4, 5(mg, tumeric, fish oil, zinc, low inflammatory diets, referral for allergy testing)	2	3	3	2	2	1	2	4	5	2	2	1	2	2	1	3	2	3	2	2
[truncated: 19 more columns]
